# Supplementary material for: CRISPR/Cas9-Based Mutagenesis of Histone H3.1 in Spinal Dynorphinergic Neurons Attenuates Thermal Sensitivity in Mice
Source: MDPI journal article supplement (doi:10.3390/ijms23063178), 2022-03-15
Supplement: s1 [file s1]

**CRISPR/Cas9-Based Mutagenesis of Histone H3.1 in Spinal Dynorphinergic  
Neurons Attenuates Thermal Sensitivity in Mice**

Mészár et al.

## Supplementary Figure S1

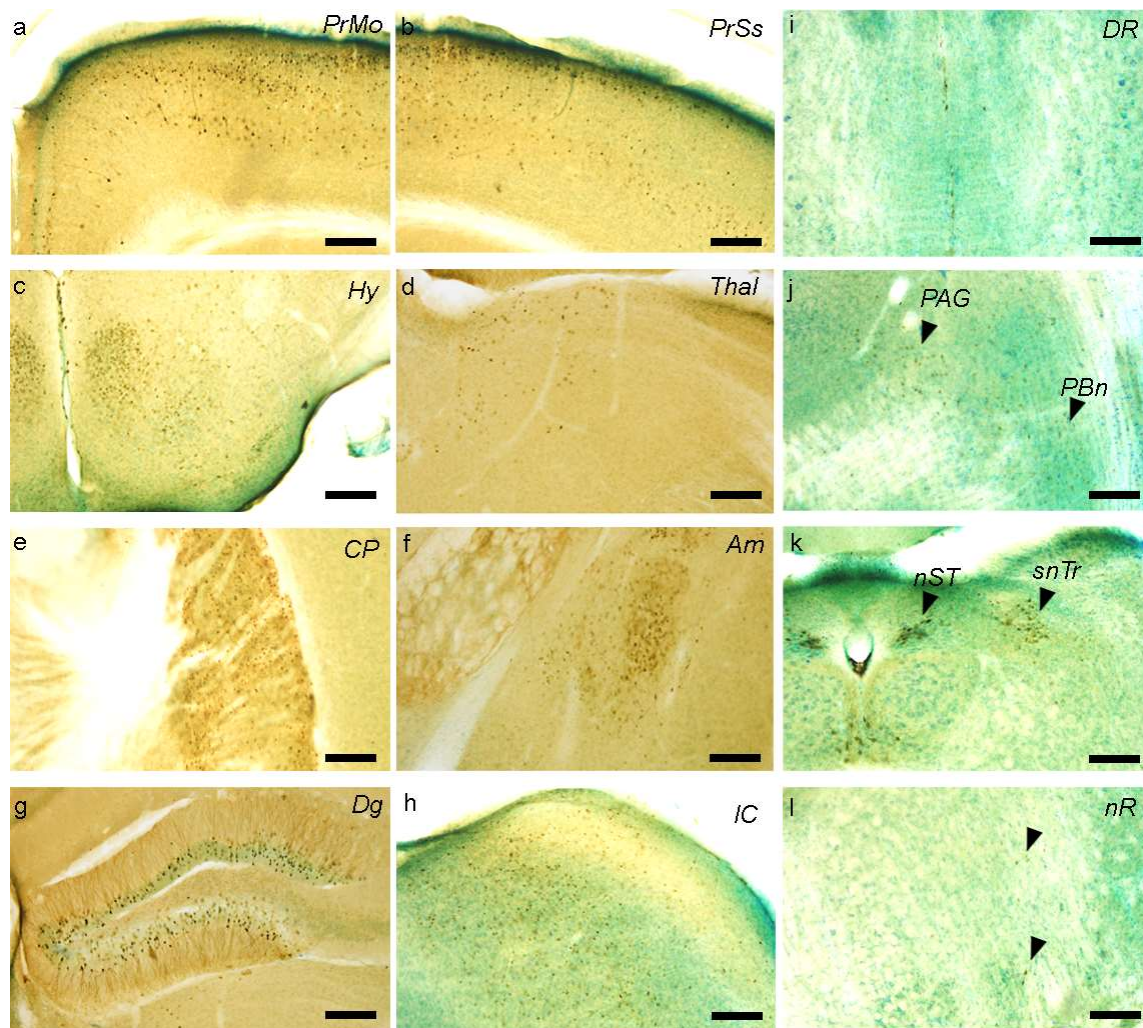

### Conventional immunohistochemistry against EGFP on coronal sections of the whole brain of a *Pdyn::cas9*-EGFP mouse

Representative images of the horseradish peroxidase-DiAminoBenzidine conversion of the EGFP signal of *Pdyn* neurons in coronal sections from a *Pdyn::cas9*-EGFP hybrid mouse, at the level of the telencephalon/diencephalon, (a-g), midbrain (h-j) and the medulla (k,l). The sections have been counterstained with Toluidine blue to enhance the contrast of the brown cell bodies. *PrMo*, primary motor area; *PrSs*, primary somatosensory area layer 2/3 and layer 5; *Dg*, dentate gyrus; *Thal*, mediodorsal nucleus of the thalamus; *Hy*, the dorsomedial nucleus of the

hypothalamus; *CP*, caudoputamen; *Am*, central amygdalar nucleus; *IC*, inferior colliculus; *PAG*, periaqueductal gray; *PBn*, parabrachial nucleus; *DR*, dorsal nucleus raphe; *nST*, the nucleus of the solitary tract; *snTr*, the spinal nucleus of the trigeminal nerve; *nR*, reticular nucleus. Scale bars are 200  $\mu\text{m}$ .

## Supplementary Figure S2

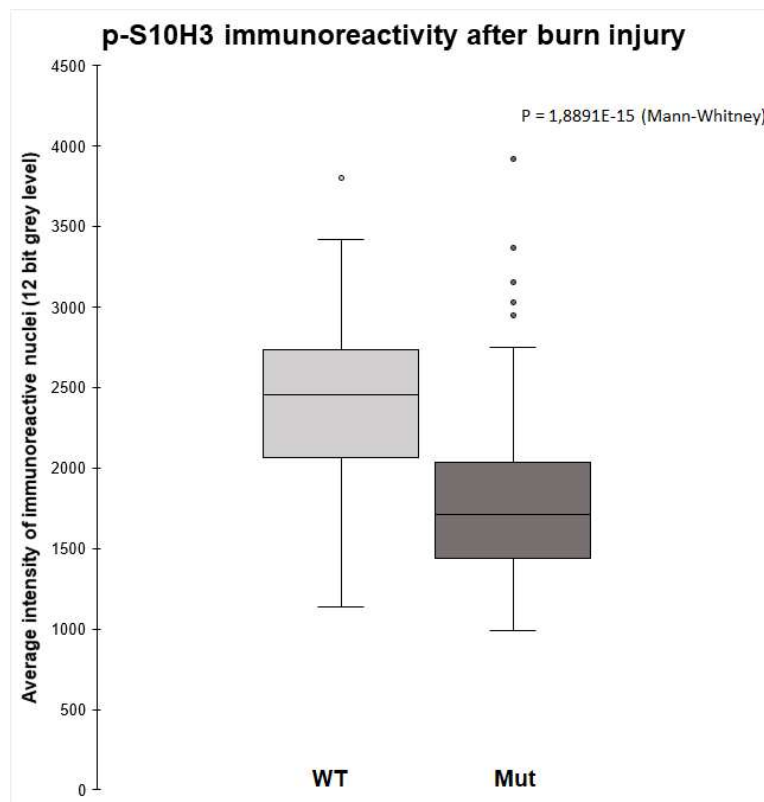

### Evaluation of p-S10H3 immunoreactivity after burn injury

Burn injury-induced p-S10H3 immunoreactivity (IR) was reduced after transduction with AAV9\_mutH3.1 as assessed by intensity profile analysis of p-S10H3-IR nuclei. The box plot indicates the average grey level values of p-S10H3-IR nuclei in spinal cord samples from transduced (AAV9\_mutH3.1; Mut) and non-transduced animals (WT). Y-axis represents the average grey level intensity of p-S10H3-IR nuclei. Dots are outlier values are also indicated in the box plot.

**Supplementary Figure S3**

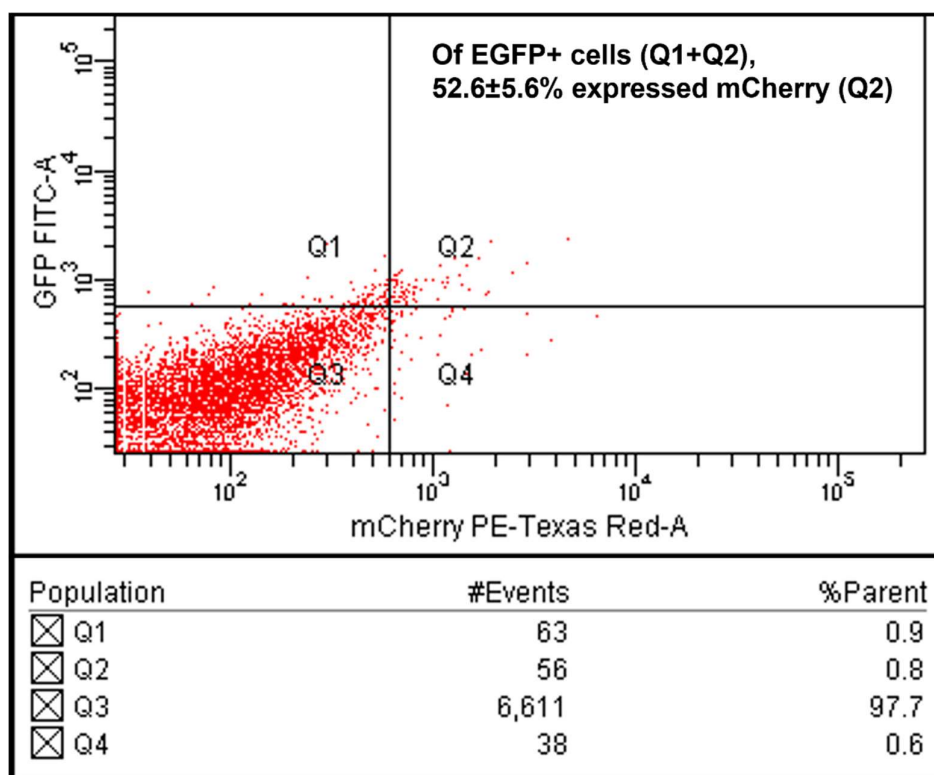

**FACS gating strategy to quantify double labelled (EGFP+/mCherry+) dynorphinergic neurons in Pdyn::cas9-EGFP mice**

Three days after post-infection with AAV9\_mutH3.1, fluorescence-activated cell sorting (FACS) was performed to determine the percentage of EGFP-positive Pdyn neurons in the spinal cord that express mCherry (*i.e.* double tagged neurons).

Scatter plots of green fluorescence intensity on the x-axis (arbitrary units; excitation 488 nm/emission 510/20 nm) and red fluorescence intensity on the y-axis (arbitrary units; excitation 586 nm/emission 610/20 nm) from a representative FACS experiment demonstrates that about half of EGFP-expressing Pdyn neurons were infected by the AAV9\_mutH3.1 based on their mCherry fluorescence.

## Supplementary Figure S4

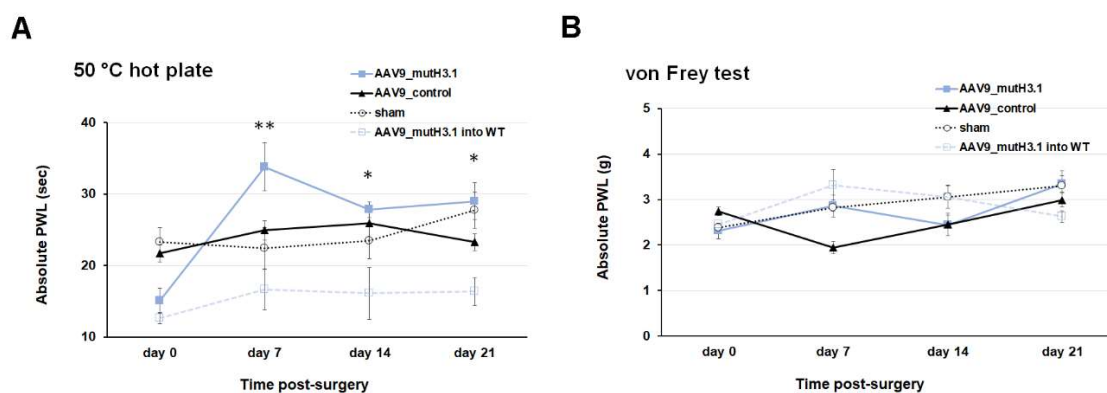

### Absolute values of paw withdrawal latency to thermal- and mechanical pain

Changes in paw withdrawal latencies (PWL) to thermal- (A) and mechanical (B) stimuli were evaluated before (day 0) and after the surgery (day 7, 14, 21) in different groups of *Pdyn::cas9-EGFP* mice (*i.e.* AAV9\_mutH3.1, AAV9\_control, sham-operated) and also in wild-type animals transduced with AAV9\_mutH3.1. Values at Day 0 represent the pre-surgery baseline values (BTM). (A) \* $p < 0.05$  and \*\* $p < 0.01$  compared with the BTM ( $p = 0.007$  on day 7,  $p = 0.01$  on day 14 and 21, *non-parametric* Mann-Whitney U test). (B) Absolute values of paw withdrawal latency to painful mechanical stimuli showed no significant alterations within, and differences between the groups.

Supplementary Figure S5

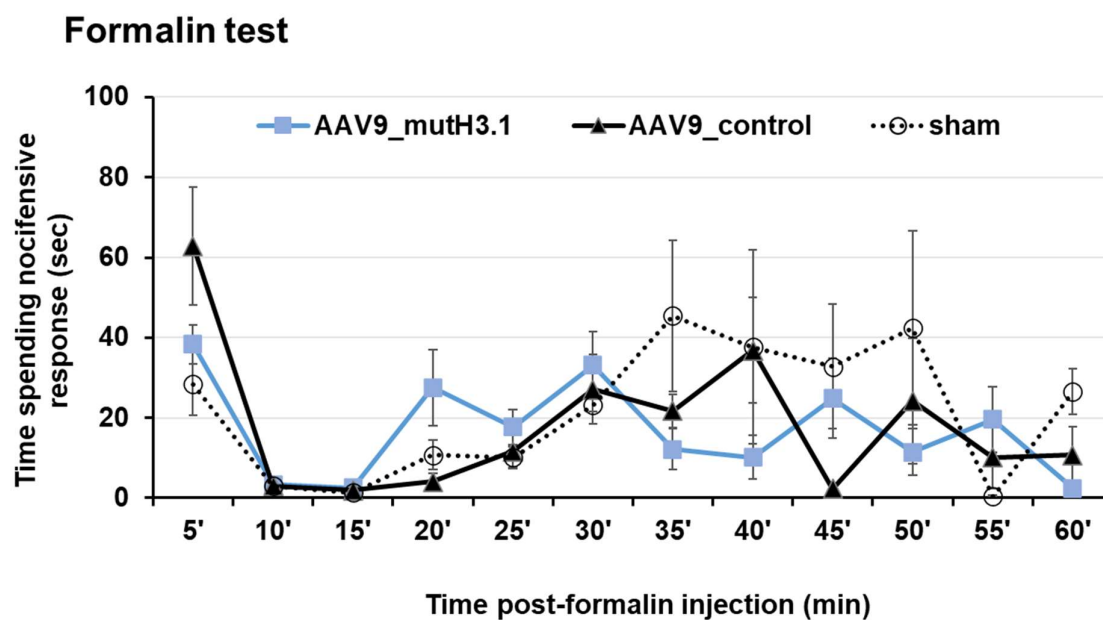

#### Assessment of formalin-induced somatic pain

This behavior was quantified as the length of time spent performing a nocifensive response (licking, biting, and shaking) in 5 min periods across an hour after application of formalin. Raw data of the time spent with formalin-induced pain-related movements in each group are presented. There were no statistically significant differences between the groups, at 0.05 level. See also **Supplementary Table S4** for statistical information.

**Supplementary Table S1. Key Resources**

| <b>REAGENT</b>                                                     | <b>COMPANY</b>                                             | <b>CATALOG OR STOCK NUMBER<br/>/ version information / external link</b>                                                                                                                                      |
|--------------------------------------------------------------------|------------------------------------------------------------|---------------------------------------------------------------------------------------------------------------------------------------------------------------------------------------------------------------|
| <b>Experimental animals</b>                                        |                                                            |                                                                                                                                                                                                               |
| Pdyn-IRES-Cre mice                                                 | The Jackson Lab.<br>ME, USA                                | # 027958                                                                                                                                                                                                      |
| Rosa26-LSL-Cas9                                                    | The Jackson Lab.<br>ME, USA                                | # 026175                                                                                                                                                                                                      |
| C57BL/6                                                            | AnimaLab<br>Hungary Kft,<br>Hungary                        | <a href="https://animalab.eu/">https://animalab.eu/</a>                                                                                                                                                       |
| <b>Viral preps</b>                                                 |                                                            |                                                                                                                                                                                                               |
| Custom made-AAV9 mutH3.1.1                                         | SignaGen Labs.<br>MD, USA                                  | # SL100865                                                                                                                                                                                                    |
| pAAV-EF1a-double floxed-hChR2(H134R)-mCherry-WPRE-HGHpA            | addgene, MA,<br>USA                                        | Addgene viral prep # 20297-AAV9                                                                                                                                                                               |
| <b>Software/device</b>                                             |                                                            |                                                                                                                                                                                                               |
| sgRNAs designing                                                   | <a href="http://broadinstitute.org">broadinstitute.org</a> | <a href="https://portals.broadinstitute.org/gpp/public/analysis-tools">https://portals.broadinstitute.org/gpp/public/analysis-tools</a>                                                                       |
| hot/cold plate                                                     | Ugo Basile, Italy                                          | #35150                                                                                                                                                                                                        |
| dynamic plantar aesthesiometer                                     | Ugo Basile, Italy                                          | #161                                                                                                                                                                                                          |
| Snapgene 5.1.0                                                     | GSL Biotech<br>LLC, CA, USA                                | <a href="https://www.snapgene.com">https://www.snapgene.com</a>                                                                                                                                               |
| Olympus FV3000 confocal systems                                    | Olympus, Tokyo,<br>Japan                                   | <a href="https://www.olympus-global.com/">https://www.olympus-global.com/</a>                                                                                                                                 |
| NeuroLucida                                                        | MBF BioScience,<br>Williston,<br>Vermont, USA              | v11.07                                                                                                                                                                                                        |
| FACS Aria III                                                      | BD Biosciences,<br>CA, USA                                 | <a href="https://www.bdbiosciences.com/">https://www.bdbiosciences.com/</a>                                                                                                                                   |
| FACSDiva 6.1.3                                                     | BD Biosciences,<br>CA, USA                                 | <a href="https://www.bdbiosciences.com/">https://www.bdbiosciences.com/</a>                                                                                                                                   |
| Vibrating blade vibratome                                          | Leica Biosystems,<br>Wetzlar, Germany                      | VT 1000S                                                                                                                                                                                                      |
| FV31S-DT                                                           | Olympus, Tokyo,<br>Japan                                   | <a href="https://www.olympus-global.com/">https://www.olympus-global.com/</a>                                                                                                                                 |
| Scyscan1272<br>X-ray High-Resolution<br>Microtomography (micro-CT) | Bruker, Kontich,<br>Belgium                                | <a href="https://www.bruker.com/en/products-and-solutions/preclinical-imaging/micro-ct/skyscan-1272.html">https://www.bruker.com/en/products-and-solutions/preclinical-imaging/micro-ct/skyscan-1272.html</a> |
| SkyScan NRecon software<br>(version 2.0.4.2)                       | Micro Photonics<br>Inc, PA, USA                            | <a href="https://www.microphotonics.com/products/micro-ct/nrecon-reconstruction-software/">https://www.microphotonics.com/products/micro-ct/nrecon-reconstruction-software/</a>                               |
| RadiAnt DICOM Viewer<br>& 3D Volume rendering tool                 | Medixant,<br>Poznań, Poland                                | <a href="https://www.radiantviewer.com/">https://www.radiantviewer.com/</a>                                                                                                                                   |



|                                                           |                                                                   |                                                                                   |
|-----------------------------------------------------------|-------------------------------------------------------------------|-----------------------------------------------------------------------------------|
| OriginPro9                                                | OriginLab Corp.,<br>MA, USA                                       | <a href="https://www.originlab.com/">https://www.originlab.com/</a>               |
| Primer3Plus                                               |                                                                   | <a href="https://primer3plus.com/">https://primer3plus.com/</a>                   |
| Fiji                                                      |                                                                   | <a href="https://imagej.net/software/fiji/">https://imagej.net/software/fiji/</a> |
| <b>Chemicals and tools</b>                                |                                                                   |                                                                                   |
| Alzet osmotic pump                                        | DURECT<br>Corporation, CA,<br>USA                                 | #1003D                                                                            |
| 5-0 coated vicryl absorbable<br>suture                    | Ethicon NJ, USA                                                   | #J391H                                                                            |
| DAB Peroxidase substrate kit                              | Vector Labs. Inc.,<br>CA, USA                                     | #SK-4100                                                                          |
| ExtAvidin peroxidase<br>conjugate                         | Sigma, MI, USA                                                    | #E-2886                                                                           |
| TRIzol™ Reagent                                           | Thermo Fisher<br>Sci. Inc. MA,<br>USA                             | #15596026                                                                         |
| High-Capacity cDNA<br>Reverse Transcription Kit           | Thermo Fisher<br>Sci. Inc. MA,<br>USA                             | #4368814                                                                          |
| RNasin® Ribonuclease<br>Inhibitor                         | Promega, WI,<br>USA                                               | #N2111                                                                            |
| DreamTaq DNA Polymerase                                   | Thermo Fisher<br>Sci. Inc. MA,<br>USA                             | #EP0701                                                                           |
| BenchTop 100 bp DNA<br>ladder                             | Promega                                                           | #G8291                                                                            |
| <b>Primary antibodies</b>                                 |                                                                   |                                                                                   |
| Chicken polyclonal to GFP                                 | abcam,<br>Cambridge, UK                                           | #ab13970                                                                          |
| Rat monoclonal [5F8] to Red<br>Fluorescent Proteins (RFP) | Chromotek<br>GmbH, Planegg-<br>Martinsried,<br>Germany            | #5f8-100                                                                          |
| p-S10H3                                                   | abcam<br>Cambridge, UK                                            | #ab5176                                                                           |
| Guinea pig Polyclonal<br>ProDynorphin antibody            | GeneTex Irvine,<br>CA, USA                                        | # GTX10280                                                                        |
| <b>Secondary antibodies</b>                               |                                                                   |                                                                                   |
| Goat anti-Rat IgG, Alexa<br>Fluor 555                     | Thermo Fisher<br>Sci. Inc. MA,<br>USA                             | #A-21434                                                                          |
| Alexa Fluor® 488 AffiniPure<br>Donkey Anti-Chicken IgY    | Jackson<br>ImmunoResearch<br>Europe Ltd,<br>Cambridgeshire,<br>UK | #703-545-155                                                                      |
| Alexa Fluor® 647 AffiniPure<br>Donkey Anti-Guinea Pig IgG | Jackson<br>ImmunoResearch                                         | #706-605-148                                                                      |

|                                                 |                                                                   |              |
|-------------------------------------------------|-------------------------------------------------------------------|--------------|
|                                                 | Europe Ltd,<br>Cambridgeshire,<br>UK                              |              |
| Biotin-SP-AffiniPure<br>Donkey Anti-Chicken IgY | Jackson<br>ImmunoResearch<br>Europe Ltd,<br>Cambridgeshire,<br>UK | #703-065-155 |
| Neurobasal medium                               | Thermo Fisher<br>Sci. Inc., MA,<br>USA                            | #21103049    |
| Glutamax supplement                             | Sigma, MI, USA                                                    | #135050-061  |
| 7.5% Na-bicarbonate                             | Thermo Fisher<br>Sci. Inc., MA,<br>USA                            | #25080       |
| papain                                          | Merck Life Sci.,<br>NJ, USA                                       | #107144      |
| hyaluronidase type I                            | Merck Life Sci.,<br>NJ, USA                                       | #H-3506      |
| Trypsin-EDTA (0.25%),<br>phenol red             | Thermo Fisher<br>Sci. Inc., MA,<br>USA                            | #25200-056   |
| FBS                                             | Sigma, MI, USA                                                    | #F9665       |
| Nylon net filter                                | Millipore, MA,<br>USA                                             | # NY4100010  |

## Supplementary Table S2

### Primer sequences applied in this study

| Name                           | 5'-3' sequence                          |
|--------------------------------|-----------------------------------------|
| STOP-cas9 WT_rev <sup>#</sup>  | CAG GAC AAC GCC CAC ACA                 |
| STOP-cas9 mut_for <sup>#</sup> | TCC CCA TCA AGC TGA TCC                 |
| STOP-cas9 mut_rev <sup>#</sup> | CTT CTT CTT TGG GGC CAT CT              |
| STOP-cas9 WT_for <sup>#</sup>  | AAG GGA GCT GCA GTG GAG TA              |
| cre_for <sup>\$</sup>          | GCA TTA CCG GTC GAT GCA ACG AGT GAT GAG |
| cre_rev <sup>\$</sup>          | GAG TGA ACG AAC CTG GTC GAA ATC AGT GCG |
| mCherry_for <sup>*</sup>       | GGGCGAGGAGGATAACATGG                    |
| mCherry_rev <sup>*</sup>       | GATGTTGACGTTGTAGGCGC                    |
| GAPDH_for <sup>*</sup>         | ACCCATCACCATCTTCCA                      |
| GAPDH_rev <sup>*</sup>         | CATCACGCCACAGCTTTCC                     |

<sup>#</sup>Primer set for genotyping Rosa26-LSL-Cas9 line was recommended by The Jackson Laboratory.

<sup>\$</sup>Primer set for genotyping Pdyn<sup>cre</sup> line was recommended by the Mouse Genetics Core (<https://mgc.wustl.edu/>).

<sup>\*</sup>Primer sets were designed by using Primer3Plus.

**Supplementary Table S3.**

**sgRNAs sequences targeting wild-type histone H3.1**

| <b>Name</b> | <b>Orientation</b> | <b>PAM sequence</b> | <b>sgRNA sequence</b> |
|-------------|--------------------|---------------------|-----------------------|
| sgRNA1      | antisense          | AGG                 | TGTCCTCAAACAGACCCACA  |
| sgRNA2      | antisense          | CGG                 | GCCGCCGGTGGACTTGCGAG  |
| sgRNA3      | antisense          | GGG                 | GGTGGCTAGCTGCTTGCGCG  |

The input sequence was the *Mus musculus* H3 clustered histone 1 (H3c1; Gene ID: 360198). This gene is intronless and encodes a replication-dependent histone that is a member of the histone H3 family. sgRNAs sequences targeting H3 clustered histone 1 (*i.e.* histone H3.1) was designed with the aid of broadinstitute.org (see **Supplementary Table S1**).

**Supplementary Table S4. Statistical analysis**

| <b>Figure</b> | <b>Comparison</b>                                                                                                        | <b>Analysis</b>                  | <b>p/U/<math>\chi^2</math>/df values</b>                                    | <b>number of animals</b>                          |
|---------------|--------------------------------------------------------------------------------------------------------------------------|----------------------------------|-----------------------------------------------------------------------------|---------------------------------------------------|
| Fig4b         | The overall influence of the treatment with the AAV9_mutH3.1 on paw withdrawal latency (PWL) in response to noxious heat | Kruskal-Wallis ANOVA             | p=0.009<br>df=3<br>$\chi^2=11.533$                                          | 7                                                 |
| Fig4b         | The overall influence of the treatment with the AAV9_control on PWL in response to noxious heat                          | Kruskal-Wallis ANOVA             | p=0.487<br>df=3<br>$\chi^2=2.433$                                           | 6                                                 |
| Fig4b         | The overall influence of the sham operation on PWL in response to noxious heat                                           | Kruskal-Wallis ANOVA             | p=0.460<br>df=3<br>$\chi^2=2.580$                                           | 4                                                 |
| Fig4b         | PWL in response to noxious heat of AAV9_mutH3.1-treated vs sham between the corresponding days                           | Non-parametric Mann-Whitney test | day7: p=0.006<br>U=27;<br>day14: p=0.012<br>U=27;<br>day21: p=0.029<br>U=26 | 7 AAV9_mutH3.1-treated and 4 sham treated         |
| Fig4b         | PWL in response to noxious heat of AAV9_mutH3.1-treated vs AAV9_control between the corresponding days                   | Non-parametric Mann-Whitney test | day7: p=0.001<br>U=42;<br>day14: p=0.013<br>U=38;<br>day21: p=0.001<br>U=42 | 7 AAV9_mutH3.1-treated and 6 AAV9_control treated |
| Fig4c         | The overall influence of the treatment with the AAV9_mutH3.1 on PWL in response to mechanical force                      | Kruskal-Wallis ANOVA             | p=0.106<br>df=3<br>$\chi^2=6.110$                                           | 4                                                 |

|       |                                                                                                                        |                                  |                                                                                  |                                                           |
|-------|------------------------------------------------------------------------------------------------------------------------|----------------------------------|----------------------------------------------------------------------------------|-----------------------------------------------------------|
| Fig4c | The overall influence of the treatment with the control-AAV9 on PWL in response to mechanical force                    | Kruskal-Wallis ANOVA             | p=0.106<br>df=3<br>$\chi^2=6.110$                                                | 3                                                         |
| Fig4c | The overall influence of the sham operation on PWL in response to mechanical force                                     | Kruskal-Wallis ANOVA             | p=0.075<br>df=3<br>$\chi^2=6.897$                                                | 3                                                         |
| Fig4c | PWL in response to mechanical pain of AAV9_mutH3.1-treated vs sham between the corresponding days                      | Non-parametric Mann-Whitney test | day7: p=0.4<br>U=9;<br>day14: p=0.4<br>U=3;<br>day21: p=0.859<br>U=7:            | 4 AAV9_mutH3.1-treated and 3 sham treated                 |
| Fig4c | PWL in response to mechanical pain of AAV9_mutH3.1-treated vs AAV9_control treated mice between the corresponding days | Non-parametric Mann-Whitney test | day7: p=0.228<br>U=10;<br>day14: p=0.857<br>U=7;<br>day21: p=0.114<br>U=11       | 4 AAV9_mutH3.1-treated and 3 AAV9_control treated mice    |
| Fig4d | The overall influence of the treatment with the AAV9_mutH3.1 on the 1 <sup>st</sup> phase of the formalin response     | Kruskal-Wallis ANOVA             | In the 1 <sup>st</sup> phase:<br>p=0.290<br>df=2<br>$\chi^2=2.474$               | 6 AAV9_mutH3.1<br>3 AAV9_control<br>and 3 sham            |
| Fig4d | The overall influence of the treatment with the AAV9_mutH3.1 on the 2 <sup>nd</sup> phase of the formalin response     | Kruskal-Wallis ANOVA             | In the 2 <sup>nd</sup> phase:<br>p=0.148<br>df=2<br>$\chi^2=3.807$               | 6 AAV9_mutH3.1<br>3 AAV9_control<br>and 3 sham            |
| Fig4d | Integrated time in response to formalin in the groups of AAV9_mutH3.1-                                                 | Non-parametric Mann-Whitney test | In the 1 <sup>st</sup> phase:<br>p=1<br>U=9<br><br>In the 2 <sup>nd</sup> phase: | 6 AAV9_mutH3.1 treated and<br>3 AAV9_control treated mice |

|       |                                                                                                            |                                  |                                                                                                        |                                                        |
|-------|------------------------------------------------------------------------------------------------------------|----------------------------------|--------------------------------------------------------------------------------------------------------|--------------------------------------------------------|
|       | treated vs AAV9_control treated mice                                                                       |                                  | p=1<br>U=9                                                                                             |                                                        |
| Fig4d | Integrated time in response to formalin in the groups of AAV9_mutH3.1-treated vs sham operation            | Non-parametric Mann-Whitney test | In the 1 <sup>st</sup> phase:<br>p=0.166<br>U=3<br><br>In the 2 <sup>nd</sup> phase:<br>p=0.166<br>U=3 | 6 AAV9_mutH3.1 treated and 3 sham-operated mice        |
| Fig4d | Integrated time in response to formalin in the groups of control_AAV9-treated vs sham operation            | Non-parametric Mann-Whitney test | In the 1 <sup>st</sup> phase:<br>p=0.4<br>U=2<br><br>In the 2 <sup>nd</sup> phase:<br>p=0.1<br>U=0     | 3 AAV9_control treated and 3 sham-operated mice        |
| Fig4e | The overall influence of the treatment with the AAV9_mutH3.1 on body weight                                | Kruskal-Wallis ANOVA             | p=0.32<br>df=3<br>$\chi^2=3.472$                                                                       | 7                                                      |
| Fig4e | The overall influence of the treatment with the control-AAV9 on body weight                                | Kruskal-Wallis ANOVA             | p=0.141<br>df=3<br>$\chi^2=5.453$                                                                      | 5                                                      |
| Fig4e | The overall influence of sham operation on body weight -                                                   | Kruskal-Wallis ANOVA             | p=0.975<br>df=3<br>$\chi^2=215$                                                                        | 4                                                      |
| Fig4e | Changes in body weight of AAV9_mutH3.1-treated vs sham operation between the corresponding days            | Non-parametric Mann-Whitney test | day7: p=0.109<br>U=5;<br>day14: p=0.927<br>U=13;<br>day21: p=0.763<br>U=12                             | 7 AAV9_mutH3.1-treated and 4 sham operated mice        |
| Fig4e | Changes in body weight of AAV9_mutH3.1-treated vs AAV9_control treated mice between the corresponding days | Non-parametric Mann-Whitney test | day7: p=0.267<br>U=10;<br>day14: p=0.755<br>U=15;<br>day21: p=0.972<br>U=18                            | 7 AAV9_mutH3.1-treated and 5 AAV9_control treated mice |

## Supplementary Data S1.

The complete sequence of the designed construct with color codes corresponds to **Fig. 2c** in the main text. Bases in black represent segments without any annotated function.

ccatagagcccacgcacatcccagcatgcctgtattgtcttccaatcctcccccttgctgtcctgccccacccacccccagaatagaatgacacctactcag  
acaatgcgatgcaatttctcattttattaggaaggacagtgggagtgacaccttcagggtcaaggaaggcacggggaggggcaaacaacagatggctgg  
caactagaaggcacagtcgaggctgatcagcgggttaaacgggccccttagactcgagttaactgtacagctcgtccatgccgctggagtgggcgccctcg  
gcgcttctgtactgttccacgatggtgtagtctcgttggggagtgatgtcaacttgatgttgacgtttaggcgccccgagctgcacgggcttcttgccctt  
gtagggtgcttgacctcagcgtcgtagtggccgctcctcagcttcagcctctgcttgatctcgcccttcaggcgccgtcctcggggtacatccgctcgagg  
aggcctcccagcccatggtcttctctgattacggggccgtcggagggggaagttggtgcgcgcagcttcacctttagatgaactcgccgtcctcgaggagg  
agtctgggtcacggtcaccacgccgctcctcgaagttcatcacgcgtcccactgaagccctcggggaaggacagctcaagtagtcggggatgtcggcg  
gggtgcttcacgtaggccttgagccgtacatgaactgaggggacaggatgtccaggcgaagggcagggggcccaccttggtcaccttcagcttggcggtctg  
ggtgccctcgtaggggcgccctcgccctcgccctgatctcgaactcgtggcggttcacggagccctccatgtgcacctgaagcgcataaactccttgatgatg  
gccatgttatcctcctcgcccttgctcaccatgggtggcgagtggttctctagtttagccagagagctctgcttatatagacctccaccgtacacgcctaccgccc  
atttgcgtcaatggggcggagttgttacgacattttggaagtcccgttgattttggtgcaaaacaaactccattgacgtcaatgggggtggagacttggaatc  
cccgtgagtcaaaccgctatccacgccattgatgtactgcaaaacgcacatcccatggttaatagcgatgactaatacgtagatgtactgcaagtaggaag  
tcccataaggctcatgtactgggcataatgccaggcgggccattaccgtcattgacgtcaatagggggcgtacttgccatatgatacattgatgtactgccaagt  
gggcagtttaccgtaataactccaccattgacgtcaatggaagtccctattggcgttactatgggaacatacgtcattattgacgtcaatgggcgggggtcgtt  
gggcggtcagccaggcgggccattaccgtaagtattgtaacgcggaactccatatgggctatgaactaatgaccccgtaattgattactattaataactatgc  
aataatcaatgtcaacgcgtaccacattttagaggttttacttgcttataaaaaactccccacactccccctgaacctgaacataaaatgaatgcaattgttgtt  
gttaacttgtttattgcagcttataatggttacaataaagcaatagcatcacaaatttcacaaataaagcattttttcactgcattctagttgtgtttgtccaac  
tcacatgtatcttatcatgtctgtcgaagcggcgccatcaccactttgtacaagaaagctgggtataacttcgtatagcattatatacgaagttatacta  
gtgctatcgatgttgagctcaggtacctataactcgtataggatactttatagaagttattctagaatggctcgtactaagcagaccgctcgaaagccacagg  
aggaaaggccccacggaacaactggctacaaaagcccccgaagagcggccgacggcggtgaagaagcctaccgctaccgtcccggcacgg  
tggcgctgcgcgagatccggcgtaccagaagtcgaccgagctgctgatccgaagctgcggttcagcgctggtgcgcgagatcgcgcaggacttcaagacc  
gacctgcgttccagagctcggcgctatggctctgcaggaggcctgtaggcctacttggtggcctcttgaagataccaacctgtgcctaccacccaagc  
gtgtcaccatcatgccaaggacatccaactggccgcccgcacatccgcgggagaggcgtaacctaaggataacttcgtataatgtatgtctatacgaagttatcaa  
gcttgctacgcgtgaccggtactcgaggataactcgtataaagtatcctatacgaagttatagcctgctttttgtacaaacttgccaacctgaaaaaagtga



tttcaggcaggtgctccaggtaattaacattaataccccaccaaccaaccatcccttaaacccttacctcttgctcagctaattacagcccgaggagaagggc  
cgtccccctcacctgtgggagtaacgcggtcagtcagagccggggcgggcggcgaggcggcgggagcggggcacggggcgaaggcagcgcgca  
gcgactccgcccccgcgcttcgcttttataggccgcccgccgctcgccataaaaggaaactttcggagcgcgccgctctgattggctgccgc  
gcacctctccgctcgccccccccctcgccccccccgccccctggcgcgccccccccccccccccccatcgctgcacaaaataattaaaaa  
ataataataacaaaattgggggtggggaggggggggagatggggagagtgaagcagaacgtggggctcacctcgaccatggtaatagcgatgactaatag  
tagatgtactgccaagtaggaaagtcacataaggtcatgtactgggcacaaatgcaggcgggccatttacgtcattgacgtcaatagggggcgctacttgccata  
tgatacacttgatgtactgccaagtgggcagtttacgtaaatactccaccattgacgtcaatggaaagtcctattggcgttactattgacgtcaatggcggg  
ggcgttggggcggtcagccaggcgggccatttacgtaagtattgtaacgcaacttttctatacaaaagttggagggcctatttccatgattccttcatatttgata  
tacgatacaaggctgttagagagataattggaattaatttgactgtaaacacaaagatattagtacaaaatacgtgacgtagaaagtaataatttcttggtagt  
ttgcagttttaaaattatgttttaaatggactatcatatgcttaccgtaacttgaaagtatttcgatttcttggtttatatcttggaaaggacgaaacaccgT  
GTCCTCAAACAGACCCACAgttttagagctagaaatagcaagttaaaataaggctagtcggttatcaacttgaaaaagtgccaccgagtcggtgctttt  
tgccggccgagggcctatttccatgattccttcatatttgcatatacgatacaaggctgttagagagataattggaattaattgactgtaaacacaaagatatt  
agtacaaaatacgtgacgtagaaagtaataatttcttggtagtgttcagttttaaaattatgttttaaatggactatcatatgcttaccgtaacttgaaagtatt  
cgatttcttggtttatatatcttgtgaaaggacgaaacaccgGCCGCCGTGGACTTGCGAGgttttagagctagaaatagcaagttaaaataaggc  
tagtcggttatcaacttgaaaaagtgccaccgagtcggtgctttttggccggccgagggcctatttccatgattccttcatatttgcatatacgatacaaggctgt  
tagagagataattggaattaatttgactgtaaacacaaagatattagtacaaaatacgtgacgtagaaagtaataatttcttggtagtgttcagttttaaaatta  
tgttttaaatggactatcatatgcttaccgtaacttgaaagtatttcgatttcttggtttatatatcttgtgaaaggacgaaacaccgGGTGGCTAGCTGC  
TTGCGCGgttttagagctagaaatagcaagttaaaataaggctagtcggttatcaacttgaaaaagtgccaccgagtcggtgc
